# Supplementary material
Source: publisher figshare collection journal article supplement (https://asha.figshare.com/ndownloader/files/22007907)
Supplement: Supplementary file 1 [file 22007907]

## PTCF Sentences Study: Supplemental Material

### PTCF SENTENCE COMPLETION TASK: PRODUCTION (FILL-IN format)

Author: Marilyn A. Nippold, PhD

#### INTRODUCTION TO THE TASK:

This is a research project on words. We hope to learn more about how well students your age use words in written language. You will see a set of sentences. These sentences contain some missing words.

**Please complete each sentence by filling in the missing word or words so that the whole sentence makes sense.** Each sentence has a clue word that will help you write a good answer. **Use a variation of the clue word so that the whole sentence is grammatically correct.**

You may use either a pencil or a pen, whichever you prefer.

Please write neatly.

Let's try some for practice.

Practice sentences:

1. The dogs would have stayed in the backyard if the owner \_\_\_\_\_ the gate.  
Clue word: **close**

A good answer would be **had closed**; if the owner **had closed** the gate. Write **had closed** in the blank space.

2. As soon as the children arrived at the lake, they \_\_\_\_\_ into the water.  
Clue word: **run**

A good answer would be **ran**; they **ran** into the water. Write **ran** in the blank space.

3. If Tina had slipped on the muddy trail, she would \_\_\_\_\_ herself.  
Clue word: **injure**

A good answer would be **have injured**; she would **have injured** herself. Write **have injured** in the blank space.

NOW YOU WILL COMPLETE THE REST OF THE SENTENCES ON YOUR OWN.

PLEASE TAKE YOUR TIME AND DO YOUR BEST WORK.

READ EACH QUESTION CAREFULLY.

PLEASE ANSWER ALL OF THE QUESTIONS. DO NOT SKIP ANY, EVEN IF YOU ARE UNSURE OF A GOOD ANSWER. JUST TAKE A GUESS.

ALSO, PLEASE DO YOUR OWN WORK. DO NOT SHARE ANSWERS WITH YOUR NEIGHBORS.

DO YOU HAVE ANY QUESTIONS?

YOU MAY BEGIN.

PLEASE TURN THE PAGE.

Test sentences:

1. Jennifer would not have been thirsty if she \_\_\_\_\_ all of her water.  
Clue word: **drink**
2. The children watched the dog as he \_\_\_\_\_ a hole under the fence.  
Clue word: **dig**
3. Jimmy would have gone to school that day if he \_\_\_\_\_ better in the morning.  
Clue word: **feel**
4. If Gus had avoided the large rock in the road, he would not \_\_\_\_\_ off his bicycle.  
Clue word: **fall**
5. The baseball coach watched the young player as he \_\_\_\_\_ into first base.  
Clue word: **slide**
6. If John had slipped off that ladder, he would \_\_\_\_\_ his arm.  
Clue word: **break**
7. The children would have enjoyed the camping trip more if they \_\_\_\_\_ in a cabin.  
Clue word: **sleep**
8. If Roy had seen the clothes rack, he could \_\_\_\_\_ his wet jacket on it.  
Clue word: **hang**
9. Linda would have arrived at the office on time if she \_\_\_\_\_ the bus.  
Clue word: **ride**
10. Jenny could not pay for her lunch because she \_\_\_\_\_ her wallet at home.  
Clue word: **leave**
11. If Gail had waited at the bakery for fresh donuts, she would \_\_\_\_\_ in a long line.  
Clue word: **stand**
12. Tim would have scored higher on the quiz if his friend \_\_\_\_\_ him the answers.  
Clue word: **tell**
13. If Jane had owned a bigger garden, she would \_\_\_\_\_ more vegetables.  
Clue word: **grow**
14. The old house would have looked nicer if the owner \_\_\_\_\_ the front porch.  
Clue word: **sweep**
15. If the dog had stayed in the house, he would not \_\_\_\_\_ the police officer.  
Clue word: **bite**
16. If Ben had completed all of the workouts, he would \_\_\_\_\_ faster at the meet.  
Clue word: **swim**
17. If Karl had not been sick, he would \_\_\_\_\_ better in the chess tournament.  
Clue word: **do**

18. Beth would have flown to Hawaii if she \_\_\_\_\_ a plane ticket.  
Clue word: **buy**
19. If Grace had been paying attention, she would \_\_\_\_\_ the ball to first base.  
Clue word: **throw**
20. Unless I am mistaken, the old sailing ship \_\_\_\_\_ in the Atlantic Ocean 100 years ago.  
Clue word: **sink**
21. Janet would not have been hungry if she \_\_\_\_\_ all of her breakfast.  
Clue word: **eat**
22. Even though we were late for the movie, we \_\_\_\_\_ good seats in the theatre.  
Clue word: **find**
23. If Jerry had gone fishing in the morning, he would \_\_\_\_\_ more trout.  
Clue word: **catch**
24. Before Mike opened his birthday gifts, he \_\_\_\_\_ each one carefully.  
Clue word: **shake**
25. Kathy would have won an award if she \_\_\_\_\_ a stronger essay.  
Key word: **write**
26. If Sue had attended her debate class, she would \_\_\_\_\_ about democracy.  
Clue word: **speak**
27. Brian would have gone to the concert if his friend \_\_\_\_\_ him there.  
Clue word: **drive**
28. The squirrels ran away after they \_\_\_\_\_ the nuts under the house.  
Clue word: **hide**
29. If Alice had purchased enough wood, she would \_\_\_\_\_ a new doghouse.  
Clue word: **build**
30. If Mary had seen the fire at school, she would \_\_\_\_\_ the fire alarm.  
Clue word: **ring**
31. Guy would have played in the band if his father \_\_\_\_\_ him the drums.  
Clue word: **teach**
32. If David had needed money, he would \_\_\_\_\_ his old piano.  
Clue word: **sell**
33. Bob could have reached the kitten in the tree if his brother \_\_\_\_\_ the ladder.  
Clue word: **hold**
34. If Father had not left for work so early, he would \_\_\_\_\_ Sarah a ride to school.  
Clue word: **give**

35. If Sally had set her alarm clock for 6:00 am, she would \_\_\_\_\_ up in time for school.  
Clue word: **wake**
36. Bill would have won the talent show if he \_\_\_\_\_ a happier melody.  
Clue word: **sing**
37. Although the dog was excitable, he \_\_\_\_\_ quietly next to his master.  
Clue word: **sit**
38. Tom would have enjoyed his dinner more if he \_\_\_\_\_ the fried chicken.  
Clue word: **choose**
39. Joe would not have finished the cake if his mother \_\_\_\_\_ it away.  
Clue word: **take**
40. The beach ball would have bounced higher if Jeff \_\_\_\_\_ more air into it.  
Clue word: **blow**

Answer Key:

**FILL-IN TASK (PRODUCTION):**

1. HAD DRUNK
2. DUG
3. HAD FELT
4. HAVE FALLEN
5. SLID
6. HAVE BROKEN
7. HAD SLEPT.
8. HAVE HUNG
9. HAD RIDDEN
10. LEFT
11. HAVE STOOD
12. HAD TOLD
13. HAVE GROWN
14. HAD SWEEPED
15. HAVE BITTEN
16. HAVE SWUM
17. HAVE DONE
18. HAD BOUGHT
19. HAVE THROWN
20. SANK
21. HAD EATEN
22. FOUND
23. HAVE CAUGHT
24. SHOOK
25. HAD WRITTEN
26. HAVE SPOKEN
27. HAD DRIVEN
28. HID
29. HAVE BUILT
30. HAVE RUNG
31. HAD TAUGHT
32. HAVE SOLD
33. HAD HELD
34. HAVE GIVEN
35. HAVE WOKEN
36. HAD SUNG
37. SAT
38. HAD CHOSEN
39. HAD TAKEN
40. HAD BLOWN

PTCF SENTENCE COMPLETION TASK: COMPREHENSION  
(MULTIPLE CHOICE format)  
Author: Marilyn A. Nippold, PhD

INTRODUCTION TO THE TASK:

This is a research project on words. We hope to learn more about how well students your age use words in written language. You will see a set of sentences. Each sentence is followed by a set of answer choices, lettered A, B, C, D, and E. Each sentence contains one or two missing words. **Please complete each sentence by choosing the correct word or words (from choices A, B, C, D, or E) so that the whole sentence makes sense.** Draw a circle around the letter of your choice. The best answer should make the **whole sentence grammatically correct.**

You may use either a pencil or a pen, whichever you prefer.

Please write neatly.

Let's try some for practice.

Practice sentences:

1. The dogs would have stayed in the backyard if the owner \_\_\_\_\_ the gate.
- A. have closed
  - B. closed
  - C. close
  - D. closing
  - E. had closed

The best answer is E, **had closed**. The dogs would have stayed in the backyard if the owner **had closed** the gate. Circle letter E.

2. As soon as the children arrived at the lake, they \_\_\_\_\_ into the water.
- A. run
  - B. runned
  - C. ran
  - D. had run
  - E. had ran

The best answer is C, **ran**. As soon as the children arrived at the lake, they **ran** into the water. Circle letter C.

3. If Tina had slipped on the muddy trail, she would \_\_\_\_\_ herself.
- A. injure
  - B. have injured
  - C. injured
  - D. had injured
  - E. injuring

The best answer is B, **have injured**. If Tina had slipped on the muddy trail, she would **have injured** herself. Circle letter B.

NOW YOU WILL COMPLETE THE REST OF THE SENTENCES ON YOUR OWN.

PLEASE TAKE YOUR TIME AND DO YOUR BEST WORK.

READ EACH QUESTION CAREFULLY.

PLEASE ANSWER ALL OF THE QUESTIONS. DO NOT SKIP ANY, EVEN IF YOU ARE UNSURE OF A GOOD ANSWER. JUST TAKE A GUESS.

ALSO, PLEASE DO YOUR OWN WORK. DO NOT SHARE ANSWERS WITH YOUR NEIGHBORS.

DO YOU HAVE ANY QUESTIONS?

YOU MAY BEGIN.

PLEASE TURN THE PAGE.

Test sentences:

1. The children watched the dog as he \_\_\_\_\_ a hole under the fence.
  - A. dug
  - B. digged
  - C. had dug
  - D. dig
  - E. had digged
  
2. If Gail had waited at the bakery for fresh donuts, she would \_\_\_\_\_ in a long line.
  - A. stand
  - B. have standed
  - C. standed
  - D. stood
  - E. have stood
  
3. If Gus had avoided the large rock in the road, he would not \_\_\_\_\_ off his bicycle.
  - A. fall
  - B. have fell
  - C. felled
  - D. fell
  - E. have fallen
  
4. Before Mike opened his birthday gifts, he \_\_\_\_\_ each one carefully.
  - A. shook
  - B. shooked
  - C. shake
  - D. shaked
  - E. had shook
  
5. The old house would have looked nicer if the owner \_\_\_\_\_ the front porch.
  - A. sweeped
  - B. had sweeped
  - C. swept
  - D. sweep
  - E. had swept
  
6. If Alice had purchased enough wood, she would \_\_\_\_\_ a new doghouse.
  - A. built
  - B. buildded
  - C. have built
  - D. have buildded
  - E. build

7. Joe would not have finished the cake if his mother \_\_\_\_\_ it away.

- A. taked
- B. took
- C. had took
- D. tooked
- E. had taken

8. Jenny could not pay for her lunch because she \_\_\_\_\_ her wallet at home.

- A. leave
- B. left
- C. leaved
- D. had left
- E. had leaved

9. Kathy would have won an award if she \_\_\_\_\_ a stronger essay.

- A. wrote
- B. had written
- C. write
- D. writed
- E. had wrote

10. Bill would have won the talent show if he \_\_\_\_\_ a happier melody.

- A. sang
- B. singed
- C. had sung
- D. sung
- E. had sang

11. Even though we were late for the movie, we \_\_\_\_\_ good seats in the theatre.

- A. had found
- B. find
- C. finded
- D. had founded
- E. found

12. If the dog had stayed in the house, he would not \_\_\_\_\_ the police officer.

- A. bite
- B. have bitten
- C. bited
- D. bitten**
- E. have bit



13. If Jerry had gone fishing in the morning, he would \_\_\_\_\_ more trout.

- A. catch
- B. caught
- C. have caught
- D. have catched
- E. catched

14. If Grace had been paying attention, she would \_\_\_\_\_ the ball to first base.

- A. throw
- B. have thrown
- C. threw
- D. have threw
- E. throwed

15. The children would have enjoyed the camping trip more if they \_\_\_\_\_ in a cabin.

- A. had slept
- B. slept
- C. slept
- D. had slept
- E. sleep

16. If Karl had not been sick, he would \_\_\_\_\_ better in the chess tournament.

- A. have did
- B. did
- C. do
- D. done
- E. have done

17. If David had needed money, he would \_\_\_\_\_ his old piano.

- A. sold
- B. sell
- C. have sold
- D. selled
- E. have selled

18. Although the dog was excitable, he \_\_\_\_\_ quietly next to his master.

- A. sit
- B. sat
- C. had sit
- D. sitted
- E. had sat

19. If Jane had owned a bigger garden, she would \_\_\_\_\_ more vegetables.

- A. grow
- B. growed
- C. have grew
- D. have grown
- E. grew

20. The beach ball would have bounced higher if Jeff \_\_\_\_\_ more air into it.

- A. blowed
- B. had blew
- C. blew
- D. had blown
- E. blowed

21. Tim would have scored higher on the quiz if his friend \_\_\_\_\_ him the answers.

- A. telled
- B. had telled
- C. had told
- D. told
- E. tell

22. Brian would have gone to the concert if his friend \_\_\_\_\_ him there.

- A. drove
- B. drived
- C. had drove
- D. drive
- E. had driven

23. The squirrels ran away after they \_\_\_\_\_ the nuts under the house.

- A. hid
- B. had hid
- C. hidden
- D. had hidden
- E. hided

24. If Mary had seen the fire at school, she would \_\_\_\_\_ the fire alarm.

- A. ring
- B. have rung
- C. ringed
- D. rang
- E. have rang

25. Tom would have enjoyed his dinner more if he \_\_\_\_\_ the fried chicken.

- A. had chosen
- B. chose
- C. had choosed
- D. choosed
- E. choose

26. If Sue had attended her debate class, she would \_\_\_\_\_ about democracy.

- A. speak
- B. spoke
- C. have spoken
- D. have spoke
- E. speaked

27. Janet would not have been hungry if she \_\_\_\_\_ all of her breakfast.

- A. had eaten
- B. ate
- C. eaten
- D. had ate
- E. eated

28. If Sally had set her alarm clock for 6:00 am, she would \_\_\_\_\_ up in time for school.

- A. wake
- B. have waked
- C. woked
- D. waked
- E. have woken

29. Bob could have reached the kitten in the tree if his brother \_\_\_\_\_ the ladder.

- A. held
- B. hold
- C. holded
- D. had held
- E. had holded

30. Unless I am mistaken, the old sailing ship \_\_\_\_\_ in the Atlantic Ocean 100 years ago.

- A. sunk
- B. sank
- C. sink
- D. had sunk
- E. had sank

31. Guy would have played in the band if his father \_\_\_\_\_ him the drums.

- A. taught
- B. had teached
- C. teach
- D. had taught
- E. teached

32. The baseball coach watched the young player as he \_\_\_\_\_ into first base.

- A. slid
- B. slide
- C. slided
- D. had slid
- E. had slided

33. Beth would have flown to Hawaii if she \_\_\_\_\_ a plane ticket.

- A. bought
- B. buyed
- C. had bought
- D. buy
- E. had buyed

34. If Father had not left for work so early, he would \_\_\_\_\_ Sarah a ride to school.

- A. have given
- B. give
- C. gave
- D. have gave
- E. gived

35. Linda would have arrived at the office on time if she \_\_\_\_\_ the bus.

- A. rode
- B. ride
- C. rided
- D. had ridden
- E. had rode

36. If Roy had seen the clothes rack, he could \_\_\_\_\_ his wet jacket on it.

- A. have hung
- B. hang
- C. hung
- D. have hanged
- E. hanged

37. If John had slipped off that ladder, he would \_\_\_\_\_ his arm.

- A. break
- B. broke
- C. have broken
- D. have broke
- E. breaked

38. If Ben had completed all of the workouts, he would \_\_\_\_\_ faster at the meet.

- A. swim
- B. have swam
- C. swimmmed
- D. have swum
- E. swum

39. Jimmy would have gone to school that day if he \_\_\_\_\_ better in the morning.

- A. felt
- B. feeled
- C. had feeled
- D. had felt
- E. feel

40. Jennifer would not have been thirsty if she \_\_\_\_\_ all of her water.

- A. drank
- B. had drunk
- C. drink
- D. had drank
- E. drinked

**ANSWER KEY:**

**MULTIPLE-CHOICE TASK (COMPREHENSION)**

- |       |       |
|-------|-------|
| 1. A  | 21. C |
| 2. E  | 22. E |
| 3. E  | 23. A |
| 4. A  | 24. B |
| 5. E  | 25. A |
| 6. C  | 26. C |
| 7. E  | 27. A |
| 8. B  | 28. E |
| 9. B  | 29. D |
| 10. C | 30. B |
| 11. E | 31. D |
| 12. B | 32. A |
| 13. C | 33. C |
| 14. B | 34. A |
| 15. D | 35. D |
| 16. E | 36. A |
| 17. C | 37. C |
| 18. B | 38. D |
| 19. D | 39. D |
| 20. D | 40. B |
